# Supplementary material
Source: Springer Nature journal article supplement (https://www.springermedizin.de/resource/supplementary/12936_2006_339_MOESM6_ESM.pdf/9547588)

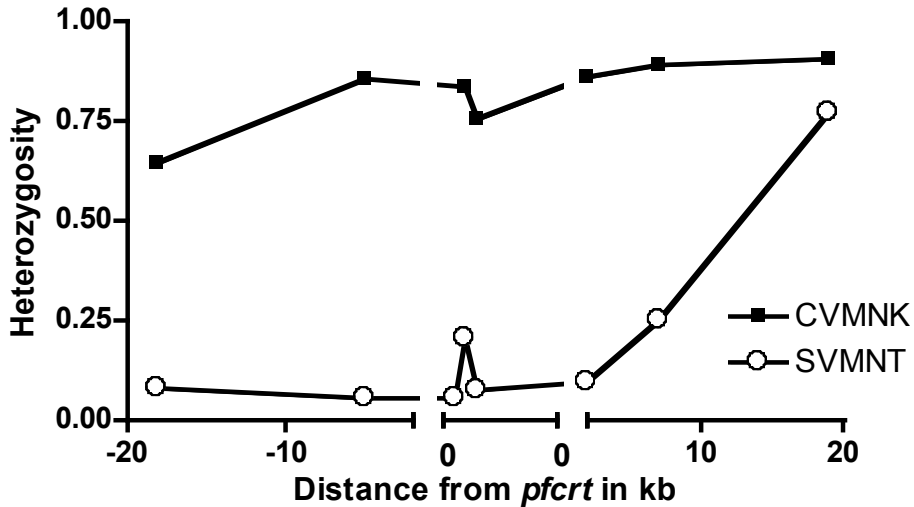

Supplement: MOESM6 [file 9547588]
